# Supplementary material for: Overexpression of Chromosome 21 miRNAs May Affect Mitochondrial Function in the Hearts of Down Syndrome Fetuses
Source: Hindawi journal article supplement (doi:10.1155/2017/8737649), 2017-01-01
Supplement: f1 [file 8737649.f1.pdf]

**Table 1. Targets of let-7c significantly downregulated in DS fetal hearts with a (FC)>|1,2| and p-value<0,05. Number of predictions by different databases are also indicated.**

| <b>Gene Symbol</b> | <b>Description</b>                                                     | <b>FC</b> | <b>p-value</b> | <b>N. of predictions</b> |
|--------------------|------------------------------------------------------------------------|-----------|----------------|--------------------------|
| E2F6               | E2F transcription factor 6                                             | -1,592    | 0,0328         | 6                        |
| DLSTP1             | dihydrolipoamide S-succinyltransferase pseudogene 1                    | -1,724    | 0,0138         | 5                        |
| HIF1AN             | hypoxia inducible factor 1 alpha subunit inhibitor                     | -1,575    | 0,0093         | 5                        |
| SLC25A12           | solute carrier family 25 member 12                                     | -1,408    | 0,0088         | 5                        |
| SLC25A4            | solute carrier family 25 member 4                                      | -1,55     | 0,0263         | 5                        |
| ARMC8              | armadillo repeat containing 8                                          | -1,541    | 0,0463         | 4                        |
| H2AFV              | H2A histone family member V                                            | -1,259    | 0,0039         | 4                        |
| MRS2               | MRS2, magnesium transporter                                            | -1,416    | 0,0054         | 4                        |
| PRDM2              | PR/SET domain 2                                                        | -1,221    | 0,0321         | 4                        |
| RBPMS              | RNA binding protein with multiple splicing                             | -1,427    | 0,0046         | 4                        |
| SORBS2             | sorbin and SH3 domain containing 2                                     | -1,451    | 0,0364         | 4                        |
| ABI2               | abl interactor 2                                                       | -1,253    | 0,0137         | 3                        |
| AKAP8              | A-kinase anchoring protein 8                                           | -1,361    | 0,0104         | 3                        |
| ALPK3              | alpha kinase 3                                                         | -1,406    | 0,0207         | 3                        |
| AREL1              | apoptosis resistant E3 ubiquitin protein ligase 1                      | -1,429    | 0,0361         | 3                        |
| ARPC5L             | actin related protein 2/3 complex subunit 5 like                       | -1,351    | 0,0333         | 3                        |
| ASPH               | aspartate beta-hydroxylase                                             | -1,403    | 0,0468         | 3                        |
| CLK2               | CDC like kinase 2                                                      | -1,422    | 0,0385         | 3                        |
| EFEMP1             | EGF containing fibulin like extracellular matrix protein 1             | -1,453    | 0,0268         | 3                        |
| GLRX3              | glutaredoxin 3                                                         | -1,232    | 0,0384         | 3                        |
| HSPB7              | heat shock protein family B (small) member 7                           | -1,422    | 0,032          | 3                        |
| KDM5C              | lysine demethylase 5C                                                  | -1,404    | 0,043          | 3                        |
| MAX                | MYC associated factor X                                                | -1,25     | 0,0485         | 3                        |
| MECP2              | methyl-CpG binding protein 2                                           | -1,22     | 0,0381         | 3                        |
| NUDT15             | nudix hydrolase 15                                                     | -1,342    | 0,0318         | 3                        |
| PANK2              | pantothenate kinase 2                                                  | -1,361    | 0,0395         | 3                        |
| PCDH7              | protocadherin 7                                                        | -1,245    | 0,0261         | 3                        |
| PDLIM5             | PDZ and LIM domain 5                                                   | -1,456    | 0,0265         | 3                        |
| TIMM23             | translocase of inner mitochondrial membrane 23                         | -1,508    | 0,0382         | 3                        |
| TROVE2             | TROVE domain family member 2                                           | -1,248    | 0,0414         | 3                        |
| UBE2G1             | ubiquitin conjugating enzyme E2 G1                                     | -1,299    | 0,0465         | 3                        |
| WBP4               | WW domain binding protein 4                                            | -1,517    | 0,0508         | 3                        |
| YLPM1              | YLP motif containing 1                                                 | -1,364    | 0,0239         | 3                        |
| ZNF219             | zinc finger protein 219                                                | -1,453    | 0,0206         | 3                        |
| APOLD1             | apolipoprotein L domain containing 1                                   | -1,511    | 0,0036         | 2                        |
| BLCAP              | bladder cancer associated protein                                      | -1,399    | 0,0022         | 2                        |
| COX10              | COX10, heme A:farnesyltransferase cytochrome c oxidase assembly factor | -1,307    | 0,0101         | 2                        |
| COX5A              | cytochrome c oxidase subunit 5A                                        | -1,263    | 0,04           | 2                        |
| DIDO1              | death inducer-obliterator 1                                            | -1,481    | 0,0056         | 2                        |
| DLAT               | dihydrolipoamide S-acetyltransferase                                   | -1,678    | 0,0377         | 2                        |
| DNPEP              | aspartyl aminopeptidase                                                | -1,287    | 0,023          | 2                        |
| DPYSL4             | dihydropyrimidinase like 4                                             | -2,404    | 0,0131         | 2                        |

|            |                                                                    |        |        |   |
|------------|--------------------------------------------------------------------|--------|--------|---|
| EML5       | echinoderm microtubule associated protein like 5                   | -1,597 | 0,0522 | 2 |
| FABP3      | fatty acid binding protein 3                                       | -1,692 | 0,017  | 2 |
| FKBP4      | FK506 binding protein 4                                            | -1,558 | 0,0549 | 2 |
| GADD45GIP1 | GADD45G interacting protein 1                                      | -1,664 | 0,0402 | 2 |
| GHITM      | growth hormone inducible transmembrane protein                     | -1,477 | 0,0233 | 2 |
| HERPUD1    | homocysteine inducible ER protein with ubiquitin like domain 1     | -1,565 | 0,0331 | 2 |
| HLA-DRB1   | major histocompatibility complex, class II, DR beta 1              | -1,634 | 0,0069 | 2 |
| KPNB1      | karyopherin subunit beta 1                                         | -1,988 | 0,0012 | 2 |
| KRT8       | keratin 8                                                          | -1,629 | 0,047  | 2 |
| MAT2A      | methionine adenosyltransferase 2A                                  | -1,621 | 0,0417 | 2 |
| METAP1     | methionyl aminopeptidase 1                                         | -1,381 | 0,0455 | 2 |
| MPC1       | mitochondrial pyruvate carrier 1                                   | -1,339 | 0,0129 | 2 |
| MRPL33     | mitochondrial ribosomal protein L33                                | -1,333 | 0,0318 | 2 |
| MTMR9      | myotubularin related protein 9                                     | -1,626 | 0,0287 | 2 |
| NDST1      | N-deacetylase and N-sulfotransferase 1                             | -1,307 | 0,0371 | 2 |
| NDUFS3     | NADH:ubiquinone oxidoreductase core subunit S3                     | -1,314 | 0,0294 | 2 |
| NELFB      | negative elongation factor complex member B                        | -1,316 | 0,0107 | 2 |
| NMT1       | N-myristoyltransferase 1                                           | -1,443 | 0,0081 | 2 |
| NOL7       | nucleolar protein 7                                                | -1,299 | 0,0258 | 2 |
| NQO2       | N-ribosyl-dihydropyridinone:quinone reductase 2                    | -1,348 | 0,0216 | 2 |
| PCCB       | propionyl-CoA carboxylase beta subunit                             | -1,335 | 0,0462 | 2 |
| PDE4DIP    | phosphodiesterase 4D interacting protein                           | -1,605 | 0,0172 | 2 |
| PDHA1      | pyruvate dehydrogenase (lipoamide) alpha 1                         | -1,524 | 0,0088 | 2 |
| PDXDC1     | pyridoxal dependent decarboxylase domain containing 1              | -1,271 | 0,0363 | 2 |
| PGS1       | phosphatidylglycerophosphate synthase 1                            | -1,233 | 0,0387 | 2 |
| PPFIA4     | PTPRF interacting protein alpha 4                                  | -1,629 | 0,0484 | 2 |
| RAB27A     | RAB27A, member RAS oncogene family                                 | -1,233 | 0,0186 | 2 |
| RAB40B     | RAB40B, member RAS oncogene family                                 | -1,475 | 0,0221 | 2 |
| RASL11B    | RAS like family 11 member B                                        | -1,473 | 0,0287 | 2 |
| RHBDF1     | rhomboid 5 homolog 1                                               | -1,269 | 0,0159 | 2 |
| SCHIP1     | schwannomin interacting protein 1                                  | -1,267 | 0,0381 | 2 |
| SDHC       | succinate dehydrogenase complex subunit C                          | -1,23  | 0,0456 | 2 |
| SRSF5      | serine and arginine rich splicing factor 5                         | -1,613 | 0,0541 | 2 |
| SUPT20H    | SPT20 homolog, SAGA complex component                              | -1,529 | 0,0079 | 2 |
| TMEM161A   | transmembrane protein 161A                                         | -1,282 | 0,0414 | 2 |
| TMEM43     | transmembrane protein 43                                           | -1,252 | 0,0273 | 2 |
| TRIP10     | thyroid hormone receptor interactor 10                             | -1,353 | 0,0476 | 2 |
| UBN1       | ubiquitin 1                                                        | -1,357 | 0,0384 | 2 |
| UQCC1      | ubiquinol-cytochrome c reductase complex assembly factor 1         | -1,517 | 0,0119 | 2 |
| UQCRFS1    | ubiquinol-cytochrome c reductase, Rieske iron-sulfur polypeptide 1 | -1,292 | 0,0242 | 2 |
| USP13      | ubiquitin specific peptidase 13 (isopeptidase T-3)                 | -1,431 | 0,0317 | 2 |
| ZNF384     | zinc finger protein 384                                            | -1,215 | 0,0322 | 2 |
| ZNF672     | zinc finger protein 672                                            | -1,305 | 0,0173 | 2 |

**Table 2. Targets of miR-155 significantly downregulated in DS fetal hearts with a (FC)>|1,2| and p-value<0,05. Number of predictions by different databases are also indicated.**

| <b>Gene Symbol</b> | <b>Description</b>                                                           | <b>FC</b> | <b>p-value</b> | <b>N. of predictions</b> |
|--------------------|------------------------------------------------------------------------------|-----------|----------------|--------------------------|
| TRIM44             | tripartite motif containing 44                                               | -1,664    | 0,0429         | 5                        |
| WEE1               | WEE1 G2 checkpoint kinase                                                    | -1,493    | 0,053          | 5                        |
| ABI2               | abl interactor 2                                                             | -1,253    | 0,0137         | 4                        |
| ARMC8              | armadillo repeat containing 8                                                | -1,541    | 0,0463         | 4                        |
| HIPK1              | homeodomain interacting protein kinase 1                                     | -1,401    | 0,052          | 4                        |
| PDLIM5             | PDZ and LIM domain 5                                                         | -1,456    | 0,0265         | 4                        |
| EHD1               | EH domain containing 1                                                       | -1,488    | 0,0118         | 3                        |
| PCDH7              | protocadherin 7                                                              | -1,245    | 0,0261         | 3                        |
| PRDM2              | PR/SET domain 2                                                              | -1,221    | 0,0321         | 3                        |
| RANBP10            | RAN binding protein 10                                                       | -1,311    | 0,0145         | 3                        |
| RBAK, NT5C         | RB associated KRAB zinc finger                                               | -1,524    | 0,0288         | 3                        |
| WBP4               | WW domain binding protein 4                                                  | -1,517    | 0,0508         | 3                        |
| ZNF91              | zinc finger protein 91                                                       | -1,49     | 0,0103         | 3                        |
| AATF               | apoptosis antagonizing transcription factor                                  | -1,23     | 0,0168         | 2                        |
| ALPK3              | alpha kinase 3                                                               | -1,406    | 0,0207         | 2                        |
| DLAT               | dihydrolipoamide S-acetyltransferase                                         | -1,678    | 0,0377         | 2                        |
| DUSP14             | dual specificity phosphatase 14                                              | -1,645    | 0,0128         | 2                        |
| EEF1D              | eukaryotic translation elongation factor 1 delta                             | -1,321    | 0,0475         | 2                        |
| EML5               | echinoderm microtubule associated protein like 5                             | -1,597    | 0,0522         | 2                        |
| HIF1AN             | hypoxia inducible factor 1 alpha subunit inhibitor                           | -1,575    | 0,0093         | 2                        |
| HSPB7              | heat shock protein family B (small) member 7                                 | -1,422    | 0,032          | 2                        |
| LPIN1              | lipin 1                                                                      | -1,838    | 0,0317         | 2                        |
| MECP2              | methyl-CpG binding protein 2                                                 | -1,22     | 0,0381         | 2                        |
| MNAT1              | MNAT1, CDK activating kinase assembly factor                                 | -1,383    | 0,0308         | 2                        |
| NDUFS3             | NADH:ubiquinone oxidoreductase core subunit S3                               | -1,314    | 0,0294         | 2                        |
| NGRN               | neugrin, neurite outgrowth associated                                        | -1,342    | 0,0363         | 2                        |
| RNF216             | ring finger protein 216                                                      | -1,506    | 0,0185         | 2                        |
| SCHIP1             | schwannomin interacting protein 1                                            | -1,267    | 0,0381         | 2                        |
| SIRT5              | sirtuin 5                                                                    | -1,255    | 0,029          | 2                        |
| SORBS2             | sorbin and SH3 domain containing 2                                           | -1,451    | 0,0364         | 2                        |
| SUPT20H            | SPT20 homolog, SAGA complex component                                        | -1,529    | 0,0079         | 2                        |
| TAX1BP1            | Tax1 binding protein 1                                                       | -1,374    | 0,03           | 2                        |
| YWHAQ              | tyrosine 3-monooxygenase/tryptophan 5-monooxygenase activation protein theta | -1,364    | 0,0483         | 2                        |

**Table 3. Targets of miR-99a significantly downregulated in DS fetal hearts with a (FC)>|1,2| and p-value<0,05. Number of predictions by different databases are also indicated.**

| Gene Symbol | Description                                                | FC     | p-value | N. of predictions |
|-------------|------------------------------------------------------------|--------|---------|-------------------|
| HIPK1       | homeodomain interacting protein kinase 1                   | -1,401 | 0,05    | 3                 |
| ARPC5L      | actin related protein 2/3 complex subunit 5 like           | -1,351 | 0,0333  | 2                 |
| CDC42       | cell division cycle 42                                     | -1,416 | 0,0047  | 2                 |
| ING1        | inhibitor of growth family member 1                        | -1,335 | 0,0058  | 2                 |
| NMT1        | N-myristoyltransferase 1                                   | -1,443 | 0,0081  | 2                 |
| PCDH7       | protocadherin 7                                            | -1,245 | 0,0261  | 2                 |
| RALGAPB     | Ral GTPase activating protein non-catalytic beta subunit   | -1,245 | 0,0414  | 2                 |
| TARDBP      | TAR DNA binding protein                                    | -1,3   | 0,0495  | 2                 |
| TNPO2       | transportin 2                                              | -1,325 | 0,0338  | 2                 |
| UQCC1       | ubiquinol-cytochrome c reductase complex assembly factor 1 | -1,517 | 0,0119  | 2                 |

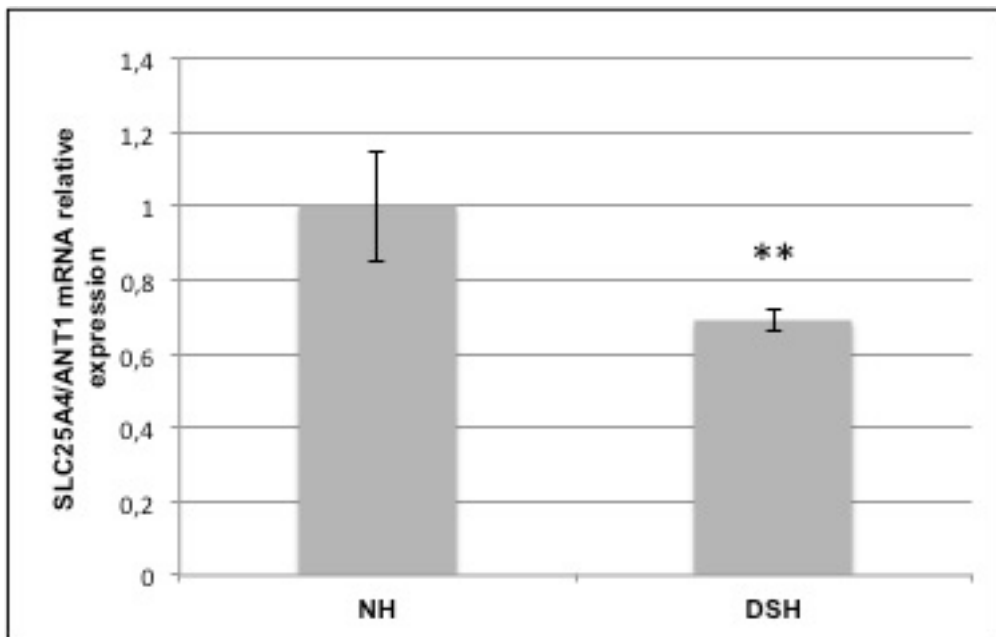

**Figure 1. *SLC25A4/ANT1* expression in heart tissue by qRT-PCR.**

Real-time PCR of *SLC25A4/ANT1* in trisomic hearts confirmed the downregulation obtained by microarray analysis. Results are expressed as relative mean values  $\pm$  SEM of 3 trisomic samples (DSH), compared with control hearts (NH) set equal to 1.

\*\* p < 0.01. P-value expresses statistical significance for trisomic versus non trisomic sample comparisons.
